# Supplementary material
Source: Springer Nature journal article supplement (https://www.springermedizin.de/resource/supplementary/13058_2010_9483_MOESM5_ESM.pdf/9702266)

**A**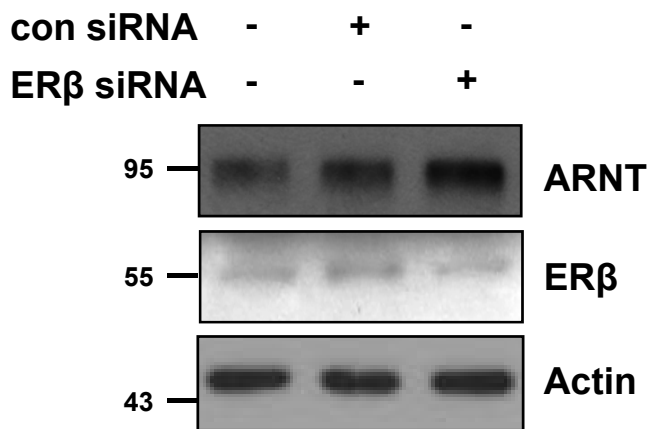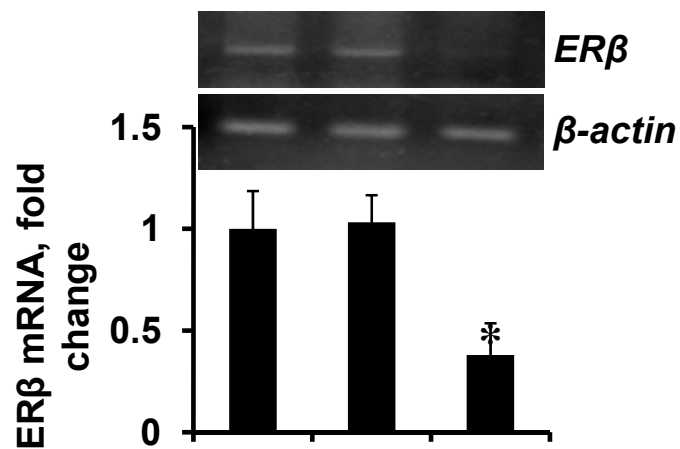

|                  |   |   |   |
|------------------|---|---|---|
| con siRNA        | - | + | - |
| ER $\beta$ siRNA | - | - | + |

**B**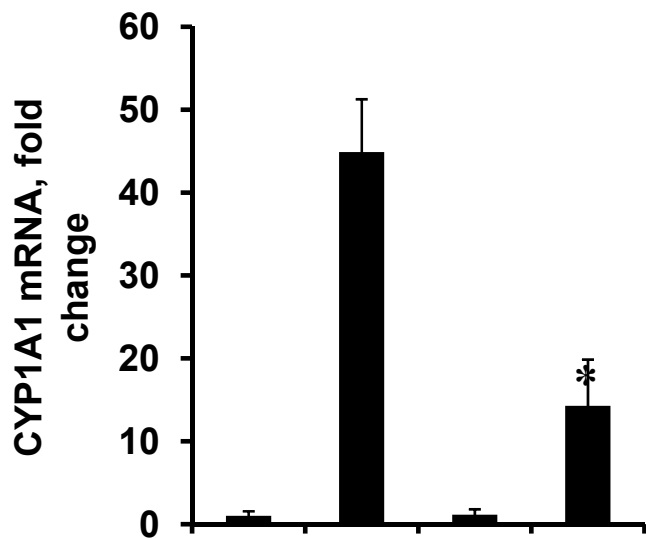

|            |   |   |   |   |
|------------|---|---|---|---|
| ER $\beta$ | - | - | + | + |
| Dioxin     | - | + | - | + |

Supplement: MOESM5 [file 9702266]
